# Supplementary material for: Saharan dust intrusions over the northern Mediterranean region in the frame of EARLINET (2014–2017): Properties and impact in radiative forcing
Source: Copernicus journal article supplement (doi:10.5194/acp-2020-611), 2020-07-01
Supplement: Supplementary file [file acp-2020-611-RC1-supplement.pdf]

Authors analyze the dust outbreaks over Mediterranean basing on multiwavelengths lidar observations from four EARLINET sites. What is important, authors make next step: they use derived parameters of dust layers for estimation the dust direct forcing. Paper is well and clearly written and can be published in ACP. I have just technical comments.

*Ln.110 the  $\alpha_{aer}$  and  $\beta_{aer}$  vertical profiles, with systematic uncertainties of ~5–15% and ~10–25%, respectively*

Probably should be opposite. Uncertainty of backscattering is lower

*Ln 112 mean uncertainty for  $AE_{\alpha}$  and  $AE_{\beta}$  is of order 7–21% and*

Providing uncertainty of Angstrom in percents makes no sense (What if it is zero?). Should be absolute values.

*Ln 187 The CRI grid was narrowed down to [1.4, 1.5]*

Why it was limited by 1.5? Real part can be higher

*Ln 188 and [0, 0.001, 0.005, 0.01] for the Imaginary part*

So only four values for Im were used?

Table 3 Authors should pay attention to uncertainty in this table

**IRI** | **1.50 ± 0.00**

What does it mean? No error? The same is for imaginary part. For some cases error of IRI is 10%. I doubt it. Imaginary part has spectral dependence. For what wavelength results are provided?

Lidar ratios at 355 nm (with corresponding uncertainties) are not provided in the table.
